# Supplementary material
Source: PubMed Central journal article supplement (PMC3442372)
Supplement: NIHMS345105-supplement-01.pdf [file NIHMS345105-supplement-01.pdf]

## ONLINE SUPPLEMENTAL MATERIALS

**Table S1.** White versus black adjusted odds ratios of ECT availability (with 95% confidence intervals) among inpatients visits for recurrent major depression in US community community hospitals, by characteristics which significantly interact with race to predict ECT availability, 1993-2007

|                                             | Hospital Region   |                   |                   |                   |
|---------------------------------------------|-------------------|-------------------|-------------------|-------------------|
|                                             | Northeast         | Midwest           | South             | West              |
| <b>Urban Location</b>                       |                   |                   |                   |                   |
| Median household income in patient ZIP code |                   |                   |                   |                   |
| 0-25th percentile                           | 1.0 ( 0.5 - 2.1 ) | 0.6 ( 0.3 - 1.2 ) | 1.3 ( 0.7 - 2.2 ) | 1.2 ( 0.5 - 2.5 ) |
| 26th-50th percentile                        | 1.1 ( 0.5 - 2.4 ) | 0.7 ( 0.3 - 1.3 ) | 1.4 ( 0.8 - 2.5 ) | 1.3 ( 0.6 - 2.8 ) |
| 51st-75th percentile                        | 1.3 ( 0.5 - 3.0 ) | 0.8 ( 0.3 - 1.7 ) | 1.7 ( 0.9 - 3.1 ) | 1.6 ( 0.7 - 3.5 ) |
| 76th-100th percentile                       | 1.4 ( 0.6 - 3.3 ) | 0.8 ( 0.3 - 1.9 ) | 1.8 ( 0.9 - 3.6 ) | 1.7 ( 0.7 - 3.9 ) |
| <b>Rural Location</b>                       |                   |                   |                   |                   |
| Median household income in patient ZIP code |                   |                   |                   |                   |
| 0-25th percentile                           | 1.1 ( 0.3 - 4.1 ) | 0.6 ( 0.2 - 2.3 ) | 1.3 ( 0.4 - 4.1 ) | 1.2 ( 0.3 - 4.8 ) |
| 26th-50th percentile                        | 1.2 ( 0.3 - 4.6 ) | 0.7 ( 0.2 - 2.5 ) | 1.5 ( 0.5 - 4.7 ) | 1.4 ( 0.4 - 5.4 ) |
| 51st-75th percentile                        | 1.4 ( 0.3 - 5.7 ) | 0.8 ( 0.2 - 3.2 ) | 1.7 ( 0.5 - 5.8 ) | 1.6 ( 0.4 - 6.7 ) |
| 76th-100th percentile                       | 1.5 ( 0.4 - 6.1 ) | 0.9 ( 0.2 - 3.4 ) | 1.9 ( 0.5 - 6.3 ) | 1.7 ( 0.4 - 7.2 ) |

No adjusted odds ratios differ significantly from 1 at  $p < .05$ . Ratios are derived from race interaction terms in the multivariate model of ECT availability; see Table 1 for predictors included in the model and sample

**Table S2.** White versus black adjusted odds ratios of ECT use (with 95% confidence intervals) among inpatient visits for recurrent major depression in US community hospitals offering ECT, by characteristics which significantly interact with race to predict ECT use, 1993-2007

|                | Hospital Region     |                     |                     |                     |
|----------------|---------------------|---------------------|---------------------|---------------------|
|                | Northeast           | Midwest             | South               | West                |
| Urban Location |                     |                     |                     |                     |
| Male Sex       |                     |                     |                     |                     |
| Age, in years  |                     |                     |                     |                     |
| 18-34          | 3.9 ( 2.7 - 5.6 ) * | 2.9 ( 1.9 - 4.2 ) * | 2.5 ( 1.7 - 3.6 ) * | 2.7 ( 1.6 - 4.4 ) * |
| 35-44          | 5.0 ( 3.7 - 6.7 ) * | 3.6 ( 2.6 - 5.2 ) * | 3.2 ( 2.4 - 4.2 ) * | 3.4 ( 2.1 - 5.5 ) * |
| 45-54          | 3.7 ( 2.7 - 5.2 ) * | 2.7 ( 1.8 - 4.2 ) * | 2.4 ( 1.7 - 3.2 ) * | 2.6 ( 1.6 - 4.1 ) * |
| 55-64          | 3.8 ( 2.5 - 5.7 ) * | 2.8 ( 1.8 - 4.4 ) * | 2.4 ( 1.6 - 3.6 ) * | 2.6 ( 1.5 - 4.4 ) * |
| 65-74          | 3.7 ( 2.7 - 5.3 ) * | 2.7 ( 1.8 - 4.1 ) * | 2.4 ( 1.7 - 3.3 ) * | 2.6 ( 1.6 - 4.2 ) * |
| 75 and older   | 2.5 ( 1.7 - 3.7 ) * | 1.8 ( 1.2 - 2.8 ) * | 1.6 ( 1.1 - 2.4 ) * | 1.7 ( 1.0 - 2.9 ) * |
| Female Sex     |                     |                     |                     |                     |
| Age, in years  |                     |                     |                     |                     |
| 18-34          | 2.8 ( 2.1 - 3.8 ) * | 2.1 ( 1.5 - 2.9 ) * | 1.8 ( 1.3 - 2.4 ) * | 1.9 ( 1.2 - 3.1 ) * |
| 35-44          | 3.6 ( 2.7 - 4.7 ) * | 2.6 ( 1.9 - 3.7 ) * | 2.3 ( 1.7 - 3.0 ) * | 2.5 ( 1.5 - 4.0 ) * |
| 45-54          | 2.7 ( 2.0 - 3.6 ) * | 2.0 ( 1.3 - 2.9 ) * | 1.7 ( 1.3 - 2.2 ) * | 1.8 ( 1.1 - 3.0 ) * |
| 55-64          | 2.7 ( 1.9 - 3.8 ) * | 2.0 ( 1.3 - 2.9 ) * | 1.7 ( 1.2 - 2.4 ) * | 1.9 ( 1.1 - 3.1 ) * |
| 65-74          | 2.7 ( 2.0 - 3.7 ) * | 2.0 ( 1.4 - 2.8 ) * | 1.7 ( 1.3 - 2.3 ) * | 1.8 ( 1.1 - 3.0 ) * |
| 75 and older   | 1.8 ( 1.3 - 2.5 ) * | 1.3 ( 0.9 - 1.9 )   | 1.1 ( 0.8 - 1.6 )   | 1.2 ( 0.7 - 2.1 )   |
| Rural Location |                     |                     |                     |                     |
| Male Sex       |                     |                     |                     |                     |
| Age, in years  |                     |                     |                     |                     |
| 18-34          | 2.5 ( 1.0 - 6.1 ) * | 1.8 ( 0.7 - 4.6 ) * | 1.6 ( 0.7 - 3.8 )   | 1.7 ( 0.7 - 4.5 )   |
| 35-44          | 3.2 ( 1.4 - 7.4 ) * | 2.3 ( 1.0 - 5.5 )   | 2.0 ( 0.9 - 4.5 )   | 2.2 ( 0.9 - 5.5 )   |
| 45-54          | 2.4 ( 1.0 - 5.7 ) * | 1.8 ( 0.7 - 4.4 )   | 1.5 ( 0.7 - 3.4 )   | 1.7 ( 0.7 - 4.2 )   |
| 55-64          | 2.5 ( 1.0 - 5.9 ) * | 1.8 ( 0.7 - 4.4 )   | 1.6 ( 0.7 - 0.7 )   | 1.7 ( 0.7 - 4.3 )   |
| 65-74          | 2.4 ( 1.0 - 5.6 ) * | 1.8 ( 0.7 - 4.2 )   | 1.5 ( 0.7 - 3.4 )   | 1.7 ( 0.7 - 4.2 )   |
| 75 and older   | 1.6 ( 0.6 - 4.1 ) * | 1.2 ( 0.5 - 3.0 )   | 1.0 ( 0.4 - 2.5 )   | 1.1 ( 0.4 - 3.0 )   |
| Female Sex     |                     |                     |                     |                     |
| Age, in years  |                     |                     |                     |                     |
| 18-34          | 1.8 ( 0.8 - 4.3 ) * | 1.3 ( 0.6 - 3.2 )   | 1.2 ( 0.5 - 2.6 )   | 1.2 ( 0.5 - 3.2 )   |
| 35-44          | 2.3 ( 1.0 - 5.2 ) * | 1.7 ( 0.7 - 3.9 )   | 1.5 ( 0.7 - 3.2 )   | 1.6 ( 0.6 - 4.0 )   |
| 45-54          | 1.7 ( 0.8 - 4.0 )   | 1.3 ( 0.5 - 3.1 )   | 1.1 ( 0.5 - 2.4 )   | 1.2 ( 0.5 - 3.0 )   |
| 55-64          | 1.8 ( 0.8 - 4.1 )   | 1.3 ( 0.5 - 3.0 )   | 1.1 ( 0.5 - 2.5 )   | 1.2 ( 0.5 - 3.0 )   |
| 65-74          | 1.7 ( 0.8 - 3.9 )   | 1.3 ( 0.6 - 2.9 )   | 1.1 ( 0.5 - 2.4 )   | 1.2 ( 0.5 - 3.0 )   |
| 75 and older   | 1.2 ( 0.5 - 2.8 )   | 0.8 ( 0.3 - 2.1 )   | 0.7 ( 0.3 - 1.8 )   | 0.8 ( 0.3 - 2.2 )   |

\*Adjusted odds ratios significantly different from 1 at  $p < .05$ . Ratios are derived from race interaction terms in multivariate model of ECT use; see Table 3 for predictors included in the model and sample characteristics.
